# Supplementary material for: Practical and Thermodynamic Constraints on Electromicrobially-Accelerated CO2 Mineralization
Source: bioRxiv or medRxiv preprint supplement (doi:10.1101/2022.01.09.475503), 2022-01-12
Supplement: Supplementary file [file media-2.pdf]

**Supplementary Information for:**  
**Practical and Thermodynamic Constraints on Electromicrobially-Accelerated CO<sub>2</sub> Mineralization**

Sabrina Marecos<sup>1</sup>, Rae Brigham<sup>1</sup>, Anastacia Dressel<sup>1\*</sup>, Larissa Gaul<sup>1\*</sup>, Linda Li<sup>1\*</sup>, Krishnathreya Satish<sup>1\*</sup>, Indira Tjokorda<sup>1\*</sup>, Jian Zheng<sup>1\*</sup>, Alexa M. Schmitz, and Buz Barstow<sup>1†</sup>

<sup>1</sup>Department of Biological and Environmental Engineering, Cornell University, Ithaca, NY 14853, USA

\*These authors contributed equally to this article.

†Corresponding author:

Buz Barstow, 228 Riley-Robb Hall, Cornell University, Ithaca, NY 14853; [bmb35@cornell.edu](mailto:bmb35@cornell.edu)

### **Supplementary Information Tables**

**Table S1.** Molecular weights and energy densities for lixiviant molecules considered in this article.

**Table S2.** Reactions for synthesis of lixiviant molecules considered in this article.

**Table S3.** Carbon-fixation and -assimilation reactions considered in this article.

**Table S4.** Net molecular input requirements for lixiviant synthesis by 6 naturally-occurring CO<sub>2</sub>-fixation cycles and the synthetic Formolase formate assimilation pathway.

### **Supplementary Notes**

**Note S1.** Calculation of biolixiviant pH.

### **Supplementary Information Datasets**

**Dataset S1.** Enzymatic reactions for synthesis of lixiviant compounds from CO<sub>2</sub> or formic acid.

---

| <b>Lixiviant Compound</b> | <b>Molecular Weight (Da)</b> | <b>Molecular Formula</b>                      | <b>Carbons per Molecule</b> |
|---------------------------|------------------------------|-----------------------------------------------|-----------------------------|
| Acetic Acid               | 60.052                       | CH <sub>3</sub> COOH                          | 2                           |
| Citric Acid               | 192.124                      | C <sub>6</sub> H <sub>8</sub> O <sub>7</sub>  | 6                           |
| 2,5-Diketo-Gluconic Acid  | 191.12                       | C <sub>6</sub> H <sub>8</sub> O <sub>7</sub>  | 6                           |
| Gluconic Acid             | 196.16                       | C <sub>6</sub> H <sub>12</sub> O <sub>7</sub> | 6                           |
| Glucose                   | 180.16                       | C <sub>6</sub> H <sub>12</sub> O <sub>6</sub> | 6                           |

**Table S1.** Molecular weights and energy densities for lixiviant molecules considered in this article.

| Reaction                                                                                                              | Reference    |
|-----------------------------------------------------------------------------------------------------------------------|--------------|
| <b>1. Acetic Acid</b>                                                                                                 |              |
| Acetyl-CoA + ADP + phosphate → Acetate + ATP + CoA                                                                    | KEGG R0229   |
| <b>2. Citric Acid</b>                                                                                                 |              |
| Pyruvate + CO <sub>2</sub> → Oxaloacetate                                                                             | KEGG RC00040 |
| Acetyl-CoA + H <sub>2</sub> O + Oxaloacetate → Citrate + CoA                                                          | KEGG RC00351 |
| <b>3. 2,5-Diketo-Gluconic Acid</b>                                                                                    |              |
| ATP + Pyruvate + HCO <sub>3</sub> <sup>-</sup> → Orthophosphate + Oxaloacetate                                        | KEGG R00344  |
| ATP + Oxaloacetate → Phosphoenolpyruvate + CO <sub>2</sub>                                                            | KEGG R00341  |
| Phosphoenolpyruvate + H <sub>2</sub> O → 2-Phospho-D-glycerate                                                        | KEGG R00658  |
| 2-Phospho-D-glycerate → 3-Phospho-D-glycerate                                                                         | KEGG R01518  |
| ATP + 3-Phospho-D-glycerate → 3-Phospho-D-glyceroyl phosphate                                                         | KEGG R01512  |
| 3-Phospho-D-glyceroyl phosphate + NADH + H <sup>+</sup> → D-Glyceraldehyde 3-phosphate + Orthophosphate               | KEGG R01061  |
| D-Glyceraldehyde 3-phosphate → Glycerone phosphate                                                                    | KEGG R01015  |
| Glycerone phosphate + D-Glyceraldehyde 3-phosphate → D-Fructose 1,6-bisphosphate                                      | KEGG R01068  |
| D-Fructose 1,6-bisphosphate + H <sub>2</sub> O → D-Fructose 6-phosphate + Orthophosphate                              | KEGG R00762  |
| D-Fructose 6-phosphate → D-Glucose 6-phosphate                                                                        | KEGG R00771  |
| D-Glucose 6-phosphate + H <sub>2</sub> O → D-Glucose + Orthophosphate                                                 | KEGG R00303  |
| beta-D-Glucose → D-Glucono-1,5-lactone + NADH + H <sup>+</sup>                                                        | KEGG R01521  |
| D-Glucono-1,5-lactone + H <sub>2</sub> O → D-Gluconate                                                                | KEGG R01519  |
| D-Gluconate → 2-Keto-D-gluconic acid + H <sup>+</sup>                                                                 | KEGG R01739  |
| 2-Keto-D-gluconic acid → 2,5-Diketo-D-gluconic acid + H <sup>+</sup> + NADPH                                          | KEGG R05823  |
| <b>4. Gluconic Acid</b>                                                                                               |              |
| ATP + Pyruvate + HCO <sub>3</sub> <sup>-</sup> → ADP + Phosphate + Oxaloacetate                                       | KEGG R00344  |
| ATP + Oxaloacetate → ADP + Phosphoenolpyruvate + CO <sub>2</sub>                                                      | KEGG R00341  |
| Phosphoenolpyruvate + H <sub>2</sub> O → 2-phospho-D-glycerate                                                        | KEGG R00658  |
| 2-phospho-D-glycerate → 3-phospho-D-glycerate                                                                         | KEGG R01518  |
| ATP + 3-phospho-D-glycerate → ADP + 3-phospho-D-glyceroyl phosphate                                                   | KEGG R01512  |
| 3-phospho-D-glyceroyl phosphate + NADH + H <sup>+</sup> → D-glyceraldehyde 3-phosphate + Phosphate + NAD <sup>+</sup> | KEGG R01061  |
| D-glyceraldehyde 3-phosphate → Glycerone phosphate                                                                    | KEGG R01015  |
| Glycerone phosphate + D-glyceraldehyde 3-phosphate → D-fructose 1,6-bisphosphate                                      | KEGG R01068  |
| D-fructose 1,6-bisphosphate + H <sub>2</sub> O → D-fructose 6-phosphate + Phosphate                                   | KEGG R00762  |
| D-fructose 6-phosphate → D-glucose 6-phosphate                                                                        | KEGG R00771  |
| D-glucose 6-phosphate + H <sub>2</sub> O → D-glucose + Phosphate                                                      | KEGG R00303  |
| D-glucose + NAD(P) <sup>+</sup> → D-glucono-1,5-lactone + NAD(P)H + H <sup>+</sup>                                    | KEGG R01520  |
| D-glucono-1,5-lactone + H <sub>2</sub> O → D-gluconate                                                                | KEGG R01519  |

**Table S2.** Reactions for synthesis of lixiviant molecules considered in this article. Reactions for lixiviant synthesis from acetyl-CoA, NAD(P)H, Ferredoxin and ATP were assembled from data from the KEGG database [Kanehisa2000a, Kanehisa2019a, Kanehisa2021a]

| Reaction                                                                                                                           | Reference                                                                                     |
|------------------------------------------------------------------------------------------------------------------------------------|-----------------------------------------------------------------------------------------------|
| <b>1. Calvin Cycle (CBB)</b>                                                                                                       |                                                                                               |
| $2 \text{ CO}_2 + 7 \text{ ATP} + 4 \text{ NADH} \rightarrow 1 \text{ Acetyl-CoA}$                                                 | Salimijazi <i>et al.</i> [Salimijazi2020b].                                                   |
| $3 \text{ CO}_2 + 7 \text{ ATP} + 5 \text{ NADH} \rightarrow 1 \text{ Pyruvate}$                                                   | Salimijazi <i>et al.</i> [Salimijazi2020b].                                                   |
| <b>2. Wood-Ljungdahl Pathway (WL)</b>                                                                                              |                                                                                               |
| $4 \text{ CO}_2 + 2 \text{ ATP} + 8 \text{ NADH} \rightarrow 2 \text{ Acetyl-CoA}$                                                 | Berg [Berg2011a].                                                                             |
| $2 \text{ Fd}_{\text{red}} + \text{Acetyl-CoA} + \text{CO}_2 \rightarrow \text{Pyruvate}$                                          | KEGG R01196.                                                                                  |
| <b>3. Reductive TCA Cycle (RTCA)</b>                                                                                               |                                                                                               |
| $4 \text{ CO}_2 + 4 \text{ ATP} + 8 \text{ NADH} \rightarrow 2 \text{ Acetyl-CoA}$                                                 | Alissandratos <i>et al.</i> [Alissandratos2015a], Claassens <i>et al.</i> [Claassens2016a].   |
| $2 \text{ Fd}_{\text{red}} + \text{Acetyl-CoA} + \text{CO}_2 \rightarrow \text{Pyruvate}$                                          | KEGG R01196.                                                                                  |
| <b>4. 3-hydroxypropionate/4-hydroxybutyrate Cycle (3HP4HB)</b>                                                                     |                                                                                               |
| $6 \text{ HCO}_3^- + 10 \text{ ATP} + 10 \text{ NADH} \rightarrow 2 \text{ pyruvate}$                                              | Berg <i>et al.</i> [BergI2007a], Claassens <i>et al.</i> [Claassens2016a].                    |
| $2 \text{ Pyruvate} \rightarrow 2 \text{ Acetyl-CoA} + 2 \text{ NADH} + 2 \text{ CO}_2$                                            | Berg [Berg2002a], Schomburg <i>et al.</i> [Schomburg2017a].                                   |
| <b>5. 3-hydroxypropionate Cycle (3HP)</b>                                                                                          |                                                                                               |
| $6 \text{ HCO}_3^- + 10 \text{ ATP} + 12 \text{ NADH} \rightarrow 2 \text{ Pyruvate}$                                              | Zarzycki <i>et al.</i> [Zarzycki2009a], Herter <i>et al.</i> [Herter2002a], Berg [Berg2002a]. |
| $2 \text{ Pyruvate} \rightarrow 2 \text{ Acetyl-CoA} + 2 \text{ NADH} + 2 \text{ CO}_2$                                            | Zarzycki <i>et al.</i> [Zarzycki2009a], Herter <i>et al.</i> [Herter2002a], Berg [Berg2002a]. |
| <b>6. 4-hydroxybutyrate Cycle (4HB)</b>                                                                                            |                                                                                               |
| $1 \text{ CO}_2 + 1 \text{ HCO}_3^- + 3 \text{ ATP} + 1 \text{ NADH} + 6 \text{ Fd}_{\text{red}} \rightarrow 1 \text{ Acetyl-CoA}$ | Huber <i>et al.</i> [Huber2008a].                                                             |
| $2 \text{ Pyruvate} \rightarrow 2 \text{ Acetyl-CoA} + 2 \text{ NADH} + 2 \text{ CO}_2$                                            | Berg [Berg2002a], Schomburg <i>et al.</i> [Schomburg2017a].                                   |
| <b>7. Formolase Pathway (FORM)</b>                                                                                                 |                                                                                               |
| $6 \text{ HCO}_2^- + 10 \text{ ATP} + 4 \text{ NADH} \rightarrow 2 \text{ 3-PG}$                                                   | Siegel <i>et al.</i> [Siegel2015a], Bar-Even <i>et al.</i> [Bar-Even2016a].                   |
| $2 \text{ 3-PG} \rightarrow 2 \text{ Pyruvate} + 2 \text{ ATP}$                                                                    | Berg [Berg2002a].                                                                             |
| $2 \text{ Pyruvate} \rightarrow 2 \text{ Acetyl-CoA} + 2 \text{ NADH} + 2 \text{ CO}_2$                                            | Berg [Berg2002a], Schomburg <i>et al.</i> [Schomburg2017a].                                   |

**Table S3.** CO<sub>2</sub>-fixation and C<sub>1</sub>-assimilation reactions. CO<sub>2</sub>-fixation and C<sub>1</sub>-assimilation reactions considered in this article were first assembled in Salimijazi *et al.* [Salimijazi2020b] and are restated here for convenience. Overall reactions for production of metabolic intermediates by 6 naturally-occurring CO<sub>2</sub>-fixation cycles and the synthetic Formolase formate assimilation pathway, and the FeMoCo nitrogenase N<sub>2</sub>-fixation reaction. Reactions can be referenced KEGG database [Kanehisa2000a, Kanehisa2019a, Kanehisa2021a]. Fd<sub>red</sub>: Reduced Ferredoxin; 3-PG: 3-Phosphoglycerate.

| Scenario         | ATP | NAD(P)H | Fd <sub>red</sub> | CO <sub>2</sub> | HCO <sub>3</sub> <sup>-</sup> | HCO <sub>2</sub> <sup>-</sup> | Total C | Target Molecule | Target Formula                                | Target |
|------------------|-----|---------|-------------------|-----------------|-------------------------------|-------------------------------|---------|-----------------|-----------------------------------------------|--------|
| Acetic_3HP       | 4   | 5       | 0                 | -1              | 3                             | 0                             | 2       | Acetate         | CH <sub>3</sub> COOH                          | 1.0    |
| Acetic_3HP4HB    | 4   | 4       | 0                 | -1              | 3                             | 0                             | 2       | Acetate         | CH <sub>3</sub> COOH                          | 1.0    |
| Acetic_4HB       | 2   | 1       | 6                 | 1               | 1                             | 0                             | 2       | Acetate         | CH <sub>3</sub> COOH                          | 1.0    |
| Acetic_CBB       | 6   | 4       | 0                 | 2               | 0                             | 0                             | 2       | Acetate         | CH <sub>3</sub> COOH                          | 1.0    |
| Acetic_FORM      | 3   | 1       | 0                 | -1              | 0                             | 3                             | 2       | Acetate         | CH <sub>3</sub> COOH                          | 1.0    |
| Acetic_RTCA      | 1   | 4       | -0                | 2               | 0                             | 0                             | 2       | Acetate         | CH <sub>3</sub> COOH                          | 1.0    |
| Acetic_WL        | -0  | 4       | -0                | 2               | 0                             | 0                             | 2       | Acetate         | CH <sub>3</sub> COOH                          | 1.0    |
| Citric_3HP       | 10  | 11      | 0                 | 0               | 6                             | 0                             | 6       | Citrate         | C <sub>6</sub> H <sub>8</sub> O <sub>7</sub>  | 1.0    |
| Citric_3HP4HB    | 10  | 9       | 0                 | 0               | 6                             | 0                             | 6       | Citrate         | C <sub>6</sub> H <sub>8</sub> O <sub>7</sub>  | 1.0    |
| Citric_4HB       | 6   | 3       | 12                | 4               | 2                             | 0                             | 6       | Citrate         | C <sub>6</sub> H <sub>8</sub> O <sub>7</sub>  | 1.0    |
| Citric_CBB       | 14  | 9       | 0                 | 6               | 0                             | 0                             | 6       | Citrate         | C <sub>6</sub> H <sub>8</sub> O <sub>7</sub>  | 1.0    |
| Citric_FORM      | 8   | 3       | 0                 | 0               | 0                             | 6                             | 6       | Citrate         | C <sub>6</sub> H <sub>8</sub> O <sub>7</sub>  | 1.0    |
| Citric_RTCA      | 4   | 8       | 2                 | 6               | 0                             | 0                             | 6       | Citrate         | C <sub>6</sub> H <sub>8</sub> O <sub>7</sub>  | 1.0    |
| Citric_WL        | 2   | 8       | 2                 | 6               | 0                             | 0                             | 6       | Citrate         | C <sub>6</sub> H <sub>8</sub> O <sub>7</sub>  | 1.0    |
| DKG_3HP          | 16  | 12      | 0                 | -2              | 8                             | 0                             | 6       | 2 5-DKG         | C <sub>6</sub> H <sub>8</sub> O <sub>7</sub>  | 1.0    |
| DKG_3HP4HB       | 16  | 10      | 0                 | -2              | 8                             | 0                             | 6       | 2 5-DKG         | C <sub>6</sub> H <sub>8</sub> O <sub>7</sub>  | 1.0    |
| DKG_4HB          | 12  | 2       | 16                | 2               | 4                             | 0                             | 6       | 2 5-DKG         | C <sub>6</sub> H <sub>8</sub> O <sub>7</sub>  | 1.0    |
| DKG_CBB          | 20  | 10      | 0                 | 4               | 2                             | 0                             | 6       | 2 5-DKG         | C <sub>6</sub> H <sub>8</sub> O <sub>7</sub>  | 1.0    |
| DKG_FORM         | 14  | 4       | 0                 | -2              | 2                             | 6                             | 6       | 2 5-DKG         | C <sub>6</sub> H <sub>8</sub> O <sub>7</sub>  | 1.0    |
| DKG_RTCA         | 10  | 8       | 4                 | 4               | 2                             | 0                             | 6       | 2 5-DKG         | C <sub>6</sub> H <sub>8</sub> O <sub>7</sub>  | 1.0    |
| DKG_WL           | 8   | 8       | 4                 | 4               | 2                             | 0                             | 6       | 2 5-DKG         | C <sub>6</sub> H <sub>8</sub> O <sub>7</sub>  | 1.0    |
| Gluconate_3HP    | 16  | 13      | 0                 | -2              | 8                             | 0                             | 6       | D-Gluconate     | C <sub>6</sub> H <sub>12</sub> O <sub>7</sub> | 1.0    |
| Gluconate_3HP4HB | 16  | 11      | 0                 | -2              | 8                             | 0                             | 6       | D-Gluconate     | C <sub>6</sub> H <sub>12</sub> O <sub>7</sub> | 1.0    |
| Gluconate_4HB    | 12  | 5       | 12                | 2               | 4                             | 0                             | 6       | D-Gluconate     | C <sub>6</sub> H <sub>12</sub> O <sub>7</sub> | 1.0    |
| Gluconate_CBB    | 20  | 11      | 0                 | 4               | 2                             | 0                             | 6       | D-Gluconate     | C <sub>6</sub> H <sub>12</sub> O <sub>7</sub> | 1.0    |
| Gluconate_FORM   | 12  | 5       | 0                 | 0               | 0                             | 6                             | 6       | D-Gluconate     | C <sub>6</sub> H <sub>12</sub> O <sub>7</sub> | 1.0    |
| Gluconate_RTCA   | 10  | 9       | 4                 | 4               | 2                             | 0                             | 6       | D-Gluconate     | C <sub>6</sub> H <sub>12</sub> O <sub>7</sub> | 1.0    |
| Gluconate_WL     | 8   | 9       | 4                 | 4               | 2                             | 0                             | 6       | D-Gluconate     | C <sub>6</sub> H <sub>12</sub> O <sub>7</sub> | 1.0    |

**Table S4.** Net molecular input requirements for lixiviant synthesis by 6 naturally-occurring CO<sub>2</sub>-fixation cycles and the synthetic Formolase formate assimilation pathway. Fd<sub>red</sub>: Reduced Ferredoxin. 3HP: 3-hydroxypropionate cycle [Zarzycki2009a]; 3HP4HB: 3-hydroxypropionate/4-hydroxybutyrate pathway [BergI2007a, Claassens2016a]; 4HB: Dicarboxylate/4-hydroxybutyrate cycle [Huber2008a]; Calvin-Benson-Bassham cycle [Berg2002a]; FORM: Formolase formate assimilation pathway [Siegel2015a]; RTCA: Reductive Tricarboxylic Acid cycle [Alissandratos2015a, Claassens2016a]; WL: Wood-Ljungdahl (WL) Pathway [Berg2002a]. Results can be reproduced running the BALANCE.PY code in the ELECTROCO2 repository [Barstow2021b].

| #         | Inverse CO <sub>2</sub> Mineralization Economy, $\zeta$ (Mol g <sup>-1</sup> ) | Lixiviant Concentration, $c_{\text{lix}}$ (Moles per m <sup>3</sup> or mM) | Extraction Efficiency, $\eta_{\text{ex}}$ | Precipitation Efficiency, $\eta_{\text{precip}}$ | Pulp Density, $\rho_{\text{pulp}}$ (grams per m <sup>3</sup> ) | Note                                                                                                                    |
|-----------|--------------------------------------------------------------------------------|----------------------------------------------------------------------------|-------------------------------------------|--------------------------------------------------|----------------------------------------------------------------|-------------------------------------------------------------------------------------------------------------------------|
| $\zeta_1$ | $2.00 \times 10^{-4}$                                                          | 100.0                                                                      | 1.00                                      | 1.00                                             | $5.00 \times 10^5$                                             | Our most optimistic estimate of inverse CO <sub>2</sub> mineralization economy, $\zeta$ .                               |
| $\zeta_2$ | $2.23 \times 10^{-4}$                                                          | 100.0                                                                      | 1.00                                      | 0.90                                             | $5.00 \times 10^5$                                             | Value of $\zeta$ corresponding to use of entire US biomass production.                                                  |
|           |                                                                                | 111.5                                                                      | 1.00                                      | 1.00                                             | $5.00 \times 10^5$                                             |                                                                                                                         |
|           |                                                                                | 100.0                                                                      | 0.90                                      | 1.00                                             | $5.00 \times 10^5$                                             |                                                                                                                         |
|           |                                                                                | 102.8                                                                      | 0.97                                      | 0.97                                             | $4.87 \times 10^5$                                             |                                                                                                                         |
| $\zeta_3$ | $1.06 \times 10^{-3}$                                                          | 100.0                                                                      | 1.00                                      | 0.19                                             | $5.00 \times 10^5$                                             | Value of $\zeta$ corresponding to first global agricultural transition identified by Slade <i>et al.</i> [Slade2014a].  |
|           |                                                                                | 100.0                                                                      | 0.19                                      | 1.00                                             | $5.00 \times 10^5$                                             |                                                                                                                         |
|           |                                                                                | 530.0                                                                      | 1.00                                      | 1.00                                             | $5.00 \times 10^5$                                             |                                                                                                                         |
|           |                                                                                | 100.0                                                                      | 1.00                                      | 1.00                                             | $9.40 \times 10^4$                                             |                                                                                                                         |
|           |                                                                                | 100.0                                                                      | 0.44                                      | 0.44                                             | $5.00 \times 10^5$                                             |                                                                                                                         |
|           |                                                                                | 229.9                                                                      | 1.00                                      | 1.00                                             | $2.18 \times 10^5$                                             |                                                                                                                         |
|           |                                                                                | 151.7                                                                      | 0.66                                      | 0.66                                             | $3.30 \times 10^5$                                             |                                                                                                                         |
| $\zeta_4$ | $3.18 \times 10^{-3}$                                                          | 100.0                                                                      | 0.25                                      | 0.25                                             | $5.00 \times 10^5$                                             | Value of $\zeta$ corresponding to second global agricultural transition identified by Slade <i>et al.</i> [Slade2014a]. |
|           |                                                                                | 398.9                                                                      | 1.00                                      | 1.00                                             | $1.25 \times 10^5$                                             |                                                                                                                         |
|           |                                                                                | 199.8                                                                      | 0.50                                      | 0.50                                             | $2.50 \times 10^5$                                             |                                                                                                                         |
| $\zeta_5$ | $6.36 \times 10^{-3}$                                                          | 237.5                                                                      | 0.42                                      | 0.42                                             | $2.10 \times 10^5$                                             | Value of $\zeta$ corresponding to third global agricultural transition identified by Slade <i>et al.</i> [Slade2014a].  |
|           |                                                                                | 316.8                                                                      | 0.32                                      | 0.32                                             | $5.00 \times 10^5$                                             |                                                                                                                         |
|           |                                                                                | 316.8                                                                      | 1.00                                      | 0.32                                             | $1.58 \times 10^5$                                             |                                                                                                                         |
| $\zeta_6$ | $1.27 \times 10^{-2}$                                                          | 282.5                                                                      | 0.35                                      | 0.35                                             | $1.77 \times 10^5$                                             | Value of $\zeta$ corresponding to use of entire global net primary production [Slade2014a].                             |

**Table S5.** Possible combinations factors that produce significant values of inverse CO<sub>2</sub> mineralization economy,  $\zeta$ . We calculated possible combinations of values of  $c_{\text{lix}}$ ,  $\eta_{\text{ex}}$ ,  $\eta_{\text{precip}}$ , and  $\rho_{\text{pulp}}$  that produce each of the values of  $\zeta$  highlighted in **Figure 2**.

## Supplementary Note 1: Calculation of Lixiviant pH

What is the pH of a weak organic acid, with a given  $pK_a$ , at a particular analytical concentration? We have adapted this answer from [Helmenstine2019a].

The association constant,  $K_a$ ,

$$K_a = [H^+][B^-]/[HB] \quad (S1)$$

where  $[H^+]$  is concentration of  $H^+$  ions,  $[B^-]$  is concentration of conjugate base ions, and  $[HB]$  is the concentration of undissociated acid molecules. We assume that the acid releases one  $H^+$  ion for every  $B^-$  ion, so

$$[H^+] = [B^-]. \quad (S2)$$

To simplify the algebra, we denote  $[H^+]$  as  $x$ . Thus,

$$[HB] = C - x,$$

where  $C$  is the analytical concentration of the acid. Thus, using **Equation S1**,

$$K_a = \frac{x \times x}{C - x}, \quad (S3)$$

$$x^2 = K_a (C - x), \quad (S4)$$

$$x^2 + K_a x - C K_a = 0. \quad (S5)$$

The proton concentration,  $x$ , can be found using the positive root of the quadratic equation,

$$x = -\frac{b}{2a} \pm \frac{1}{2a} \sqrt{b^2 - 4ac}, \quad (S6)$$

$$x = -\frac{K_a}{2} \pm \frac{1}{2} \sqrt{K_a^2 + 4C K_a}. \quad (S7)$$

Thus,

$$pH = -\log_{10} \left( -\frac{K_a}{2} + \frac{1}{2} \sqrt{K_a^2 + 4C K_a} \right). \quad (S8)$$

For acetic acid ( $pK_a = 4.75$ ), citric acid ( $pK_a = 3.13$ ), and gluconic acid ( $pK_a = 3.72$ ) at 100 mM,

$$pH_{\text{acetic}} = 2.9, \quad (S9)$$

$$pH_{\text{gluconic}} = 2.4, \quad (S10)$$

$$pH_{\text{citric}} = 2.1. \quad (S11)$$



## Supplementary Information References

- [Alissandratos2015a] A. Alissandratos and C. J. Easton. “Biocatalysis for the application of CO<sub>2</sub> as a chemical feedstock”. *Beilstein Journal of Organic Chemistry* 11 (2015), pp. 2370–2387. doi:10.3762/bjoc.11.259.
- [Bar-Even2016a] A. Bar-Even. “Formate Assimilation: The Metabolic Architecture of Natural and Synthetic Pathways.” *Biochemistry* 55 (2016), pp. 3851–63. doi:10.1021/acs.biochem.6b00495.
- [Barstow2021b] B. Barstow. “ElectroCO<sub>2</sub>”. *Zenodo* (2021). doi:10.5281/zenodo.5805345.
- [Berg2002a] J. Berg, J. Tymoczko, and L. Stryer. *Biochemistry*. 5th. New York, NY: W H Freeman, 2002.
- [Berg2011a] I. A. Berg. “Ecological Aspects of the Distribution of Different Autotrophic CO<sub>2</sub> Fixation Pathways”. *Applied and Environmental Microbiology* 77 (2011), pp. 1925–1936. doi:10.1128/aem.02473-10.
- [Berg12007a] I. A. Berg, D. Kockelkorn, W. Buckel, and G. Fuchs. “A 3-Hydroxypropionate/4-Hydroxybutyrate Autotrophic Carbon Dioxide Assimilation Pathway in Archaea”. *Science* 318 (2007), pp. 1782–1786. doi:10.1126/science.1149976.
- [Claassens2016a] N. J. Claassens, D. Z. Sousa, V. A. M. dos Santos, W. M. de Vos, and J. van der Oost. “Harnessing the power of microbial autotrophy”. *Nature Reviews Microbiology* 14 (2016), pp. 692–706. doi:10.1038/nrmicro.2016.130.
- [Helmenstine2019a] T. Helmenstine, “How to Calculate the pH of a Weak Acid”. <https://www.thoughtco.com/calculating-ph-of-a-weak-acid-problem-609589> (Visited on 01/08/2022).
- [Herter2002a] S. Herter, G. Fuchs, A. Bacher, and W. Eisenreich. “A bicyclic autotrophic CO<sub>2</sub> fixation pathway in *Chloroflexus aurantiacus*”. *Journal of Biological Chemistry* 277 (2002), pp. 20277–20283. doi:10.1074/jbc.m201030200.
- [Huber2008a] H. Huber, M. Gallenberger, U. Jahn, E. Eylert, I. A. Berg, D. Kockelkorn, W. Eisenreich, and G. Fuchs. “A dicarboxylate/4-hydroxybutyrate autotrophic carbon assimilation cycle in the hyperthermophilic *Archaeum Ignicoccus hospitalis*”. *Proceedings of the National Academy of Sciences* 105 (2008), pp. 7851–7856. doi:10.1073/pnas.0801043105.
- [Kanehisa2000a] M. Kanehisa and S. Goto. “KEGG: Kyoto Encyclopedia of Genes and Genomes”. *Nucleic Acids Research* 28.1 (2000), pp. 27–30. doi:10.1093/nar/28.1.27.
- [Kanehisa2019a] M. Kanehisa. “Toward understanding the origin and evolution of cellular organisms”. *Protein Science* 28.11 (2019), pp. 1947–1951. doi:10.1002/pro.3715.
- [Kanehisa2021a] M. Kanehisa, M. Furumichi, Y. Sato, M. Ishiguro-Watanabe, and M. Tanabe. “KEGG: integrating viruses and cellular organisms”. *Nucleic Acids Research* 49.D1 (2020), gkaa970–. doi:10.1093/nar/gkaa970.
- [Salimijazi2020b] F. Salimijazi, J. Kim, A. M. Schmitz, R. Grenville, A. Bocarsly, and B. Barstow. “Constraints on the Efficiency of Engineered Electromicrobial Production”. *Joule* 4 (2020), pp. 2101–2130. doi:10.1016/j.joule.2020.08.010.
- [Schomburg2017a] I. Schomburg, L. Jeske, M. Ulbrich, S. Placzek, A. Chang, and D. Schomburg. “The BRENDA enzyme information system—From a database to an expert system”. *Journal of Biotechnology* 261 (2017), pp. 194–206. doi:10.1016/j.jbiotec.2017.04.020.
- [Siegel2015a] J. B. Siegel, A. L. Smith, S. Poust, A. J. Wargacki, A. Bar-Even, C. Louw, B. W. Shen, C. B. Eiben, H. M. Tran, E. Noor, J. L. Gallaher, J. Bale, Y. Yoshikuni, M. H. Gelb, J. D. Keasling, B. L. Stoddard, M. E. Lidstrom, and D. Baker. “Computational protein design enables a novel one-carbon assimilation pathway”. *Proceedings of the National Academy of Sciences* 112 (2015), p. 3704–3709. doi:10.1073/pnas.1500545112.

[Zarzycki2009a]

J. Zarzycki, V. Brecht, M. Müller, and G. Fuchs. “Identifying the missing steps of the autotrophic 3-hydroxypropionate CO<sub>2</sub> fixation cycle in *Chloroflexus aurantiacus*”. *Proceedings of the National Academy of Sciences* 106 (2009), p. 21317. [doi.10.1073/pnas.0908356106](https://doi.org/10.1073/pnas.0908356106).
